# Supplementary material for: Risk of transmittable blood‐borne pathogens in blood units from blood donor dogs in Canada
Source: PubMed Central journal article supplement — J Vet Intern Med. 2021 May 7;35(3):1316–24. doi: 10.1111/jvim.16139 (PMC8162595; doi:10.1111/jvim.16139), 2021-05-07
Supplement: JVIM-35-1316-s001.pdf [file JVIM-35-1316-s001.pdf]

**Table S1:** Distribution of 1779 blood units from 982 canine blood donors tested by SNAP 4Dx/4Dx Plus according to their antibody positivity to *Anaplasma* spp. in a population of canine blood donors, Canada.

| Characteristics                         | Number of dogs <sup>a</sup> | Number of blood units <sup>a</sup> | Number (%) of antibody-positive blood units to <i>Anaplasma</i> spp. |
|-----------------------------------------|-----------------------------|------------------------------------|----------------------------------------------------------------------|
| <b>Year of collection</b>               |                             |                                    |                                                                      |
| 2010-2012                               | 377                         | 1279                               | 9 (.70)                                                              |
| 2013-2014                               | 455                         | 464                                | 1 (.22)                                                              |
| 2015-2016                               | 35                          | 35                                 | 0 (.00)                                                              |
| <b>Season of collection</b>             |                             |                                    |                                                                      |
| April-October                           | 765                         | 1188                               | 6 (.51)                                                              |
| November-March                          | 465                         | 590                                | 4 (.68)                                                              |
| <b>Age of dog at time of collection</b> |                             |                                    |                                                                      |
| < 2 years                               | 155                         | 176                                | 0 (.00)                                                              |
| 2 to < 8 years                          | 775                         | 1357                               | 9 (.66)                                                              |
| ≥ 8 years                               | 145                         | 246                                | 1 (.41)                                                              |
| <b>Number of blood donation</b>         |                             |                                    |                                                                      |
| 1                                       | 947                         | 947                                | 5 (.53)                                                              |
| ≥ 2                                     | 400                         | 832                                | 5 (.60)                                                              |
| <b>Borrelia burgdorferi antibodies</b>  |                             |                                    |                                                                      |
| Positive                                | 26                          | 51                                 | 4 (7.84)                                                             |
| Negative                                | 963                         | 1726                               | 6 (.35)                                                              |
| <b>Province of residency</b>            |                             |                                    |                                                                      |
| Alberta                                 | 265                         | 3020                               | 2 (.66)                                                              |
| Manitoba                                | 665                         | 1416                               | 8 (.56)                                                              |
| Ontario                                 | 22                          | 27                                 | 0 (.00)                                                              |
| Quebec                                  | 27                          | 27                                 | 0 (.00)                                                              |
| <b>Sex</b>                              |                             |                                    |                                                                      |
| Female                                  | 421                         | 760                                | 3 (.39)                                                              |
| Male                                    | 548                         | 999                                | 7 (.70)                                                              |
| <b>Breed category</b>                   |                             |                                    |                                                                      |
| Border Collie                           | 14                          | 21                                 | 0 (.00)                                                              |
| Boxer                                   | 28                          | 48                                 | 0 (.00)                                                              |
| Doberman Pinscher                       | 12                          | 21                                 | 0 (.00)                                                              |
| German Shepherd                         | 35                          | 77                                 | 1 (1.3)                                                              |
| Golden Retriever                        | 76                          | 153                                | 2 (1.3)                                                              |
| Great Dane                              | 15                          | 21                                 | 0 (.00)                                                              |
| Greyhound                               | 14                          | 18                                 | 0 (.00)                                                              |
| Labrador Retriever                      | 116                         | 236                                | 1 (.42)                                                              |
| Mixed                                   | 425                         | 782                                | 5 (.64)                                                              |
| Other purebred <sup>b</sup>             | 138                         | 226                                | 1 (.44)                                                              |
| Rottweiler                              | 15                          | 36                                 | 0 (.00)                                                              |
| Siberian Husky                          | 9                           | 22                                 | 0 (.00)                                                              |

<sup>a</sup> Missing values are present for some variables. The number of dogs in each category could add up to > 982 if a dog could be included in more than 1 category (ex. "Year of collection", a dog could be represented once in each year category).

<sup>b</sup> All other purebred dogs with less than 50 blood collections each.

**Table S2:** Distribution of 6140 blood units from 1914 dogs according to their PCR positivity to 5 pathogens in a population of canine blood donors, Canada.

| Characteristics                         | Number of dogs <sup>a</sup> | Number of blood units <sup>a</sup> | Number (%) of PCR-positive blood units |                        |                       |                                                |                              |              |  |
|-----------------------------------------|-----------------------------|------------------------------------|----------------------------------------|------------------------|-----------------------|------------------------------------------------|------------------------------|--------------|--|
|                                         |                             |                                    | <i>Anaplasma phagocytophilum</i>       | <i>Bartonella</i> spp. | <i>Brucella canis</i> | " <i>Candidatus Mycoplasma haematoparvum</i> " | <i>Mycoplasma haemocanis</i> | ≥ 1 pathogen |  |
| <b>Year of collection</b>               |                             |                                    |                                        |                        |                       |                                                |                              |              |  |
| 2010-2012                               | 709                         | 2046                               | 1 (.05)                                | 2 (.10)                | 1 (.05)               | 3 (.15)                                        | 10 (.49)                     | 14 (.68)     |  |
| 2013-2014                               | 708                         | 1795                               | 1 (.06)                                | 1 (.06)                | 1 (.06)               | 4 (.22)                                        | 11 (.61)                     | 13 (.72)     |  |
| 2015-2016                               | 1158                        | 2288                               | 2 (.09)                                | 2 (.09)                | 0 (.00)               | 11 (.48)                                       | 25 (1.09)                    | 37 (1.62)    |  |
| <b>Season of collection</b>             |                             |                                    |                                        |                        |                       |                                                |                              |              |  |
| April-October                           | 1591                        | 3682                               | 3 (.08)                                | 2 (.05)                | 0 (.00)               | 12 (.33)                                       | 27 (.73)                     | 39 (1.06)    |  |
| November-March                          | 1254                        | 2447                               | 1 (.04)                                | 3 (.12)                | 2 (.08)               | 6 (.25)                                        | 19 (.78)                     | 25 (1.02)    |  |
| <b>Age of dog at time of collection</b> |                             |                                    |                                        |                        |                       |                                                |                              |              |  |
| < 2 years                               | 369                         | 512                                | 1 (.20)                                | 1 (.20)                | 1 (.20)               | 2 (.39)                                        | 10 (1.95)                    | 13 (2.54)    |  |
| 2 to < 8 years                          | 1586                        | 4789                               | 2 (.04)                                | 4 (.08)                | 1 (.02)               | 16 (.33)                                       | 36 (.75)                     | 51 (1.06)    |  |
| ≥ 8 years                               | 283                         | 839                                | 1 (.12)                                | 0 (.00)                | 0 (.00)               | 0 (.00)                                        | 1 (.12)                      | 1 (.12)      |  |
| <b>Number of blood collection</b>       |                             |                                    |                                        |                        |                       |                                                |                              |              |  |
| 1                                       | 1886                        | 1886                               | 1 (.05)                                | 4 (0.21)               | 2 (.11)               | 15 (.80)                                       | 42 (2.23)                    | 56 (2.97)    |  |
| ≥ 2                                     | 1143                        | 4254                               | 3 (.07)                                | 1 (0.02)               | 0 (.00)               | 3 (.07)                                        | 5 (.12)                      | 9 (.21)      |  |
| <b>Borrelia burgdorferi antibodies</b>  |                             |                                    |                                        |                        |                       |                                                |                              |              |  |
| Positive                                | 23                          | 47                                 | 0 (.00)                                | 0 (.00)                | 0 (.00)               | 0 (.00)                                        | 1 (2.13)                     | 1 (2.13)     |  |
| Negative                                | 960                         | 1722                               | 1 (.06)                                | 3 (.17)                | 2 (.12)               | 6 (.35)                                        | 14 (.81)                     | 20 (1.16)    |  |
| <b>Province of residency</b>            |                             |                                    |                                        |                        |                       |                                                |                              |              |  |
| Alberta                                 | 493                         | 1348                               | 0 (.00)                                | 1 (.20)                | 0 (.00)               | 3 (.61)                                        | 14 (2.84)                    | 19 (1.41)    |  |
| Manitoba                                | 1245                        | 4464                               | 4 (.32)                                | 4 (.32)                | 2 (.16)               | 12 (.96)                                       | 32 (2.57)                    | 44 (.99)     |  |
| Ontario                                 | 125                         | 201                                | 0 (.00)                                | 0 (.00)                | 0 (.00)               | 2 (1.60)                                       | 0 (.00)                      | 2 (1.00)     |  |
| Quebec                                  | 44                          | 108                                | 0 (.00)                                | 0 (.00)                | 0 (.00)               | 0 (.00)                                        | 0 (.00)                      | 0 (.00)      |  |
| <b>Sex</b>                              |                             |                                    |                                        |                        |                       |                                                |                              |              |  |
| Female                                  | 841                         | 2732                               | 0 (.00)                                | 1 (.12)                | 1 (.12)               | 6 (.71)                                        | 11 (1.31)                    | 16 (.59)     |  |
| Male                                    | 1055                        | 3382                               | 4 (.38)                                | 4 (.38)                | 1 (.09)               | 11 (1.04)                                      | 35 (3.32)                    | 49 (1.45)    |  |

| Characteristics             | Number of dogs <sup>a</sup> | Number of blood units <sup>a</sup> | Number (%) of PCR-positive blood units |                        |                       |                                                |                              |              |         |
|-----------------------------|-----------------------------|------------------------------------|----------------------------------------|------------------------|-----------------------|------------------------------------------------|------------------------------|--------------|---------|
|                             |                             |                                    | <i>Anaplasma phagocytophilum</i>       | <i>Bartonella</i> spp. | <i>Brucella canis</i> | " <i>Candidatus Mycoplasma haematoparvum</i> " | <i>Mycoplasma haemocanis</i> | ≥ 1 pathogen |         |
| <b>Breed category</b>       |                             |                                    |                                        |                        |                       |                                                |                              |              |         |
| Border Collie               | 24                          | 88                                 | 0 (.00)                                | 0 (.00)                | 0 (.00)               | 0 (.00)                                        | 0 (.00)                      | 0 (.00)      | 0 (.00) |
| Boxer                       | 48                          | 181                                | 0 (.00)                                | 0 (.00)                | 0 (.00)               | 0 (.00)                                        | 1 (2.08)                     | 1 (.55)      |         |
| Doberman Pinscher           | 21                          | 66                                 | 0 (.00)                                | 0 (.00)                | 0 (.00)               | 0 (.00)                                        | 0 (.00)                      | 0 (.00)      |         |
| German Shepherd             | 52                          | 183                                | 1 (1.92)                               | 1 (1.92)               | 0 (.00)               | 0 (.00)                                        | 0 (.00)                      | 1 (.55)      |         |
| Golden Retriever            | 136                         | 478                                | 0 (.00)                                | 0 (.00)                | 0 (.00)               | 0 (.00)                                        | 1 (.74)                      | 1 (.21)      |         |
| Great Dane                  | 37                          | 99                                 | 0 (.00)                                | 0 (.00)                | 0 (.00)               | 2 (5.41)                                       | 0 (.00)                      | 2 (2.02)     |         |
| Greyhound                   | 26                          | 73                                 | 0 (.00)                                | 0 (.00)                | 0 (.00)               | 1 (3.85)                                       | 2 (7.69)                     | 3 (4.11)     |         |
| Labrador Retriever          | 219                         | 677                                | 0 (.00)                                | 0 (.00)                | 0 (.00)               | 1 (.46)                                        | 1 (.46)                      | 2 (.30)      |         |
| Mixed                       | 863                         | 2894                               | 2 (.23)                                | 2 (.23)                | 0 (.00)               | 8 (.93)                                        | 25 (2.90)                    | 34 (1.17)    |         |
| Other purebred <sup>b</sup> | 277                         | 834                                | 0 (.00)                                | 0 (.00)                | 1 (.36)               | 2 (0.72)                                       | 7 (2.53)                     | 9 (1.08)     |         |
| Rottweiler                  | 36                          | 134                                | 0 (.00)                                | 0 (.00)                | 0 (.00)               | 0 (.00)                                        | 0 (.00)                      | 0 (.00)      |         |
| Siberian Husky              | 16                          | 78                                 | 0 (.00)                                | 0 (.00)                | 0 (.00)               | 0 (.00)                                        | 0 (.00)                      | 0 (.00)      |         |

<sup>a</sup> Missing values are present for some variables. The number of dogs in each category could add up to > 1911 dogs if 1 dog could be present in more than 1 category (ex. "Year of collection", a dog could be represented once in each year category); SNAP 4 Dx/4Dx Plus-positive blood units were excluded (n=10 blood units and 3 dogs) from PCR analyses.

<sup>b</sup> All other purebred with less than 50 blood collections each.

**Table S3:** Distribution of 6140<sup>a</sup> blood units from 1914 caning blood donors according to their pooled and individual PCR test results, Canada, 2010-2016.

**A. *Anaplasma phagocytophilum***

| Pooled testing    | Individual testing |          |                       |
|-------------------|--------------------|----------|-----------------------|
|                   | Negative           | Positive | No individual testing |
| Negative          | 31                 | 0        | 4011                  |
| Positive          | 8                  | 3        | 0                     |
| No pooled testing | 2086               | 1        | 0                     |

**C. *Brucella canis***

| Pooled testing    | Individual testing |          |                       |
|-------------------|--------------------|----------|-----------------------|
|                   | Negative           | Positive | No individual testing |
| Negative          | 34                 | 0        | 4019                  |
| Positive          | 0                  | 0        | 0                     |
| No pooled testing | 2085               | 2        | 0                     |

**E. *Mycoplasma haemocanis***

| Pooled testing    | Individual testing |          |                       |
|-------------------|--------------------|----------|-----------------------|
|                   | Negative           | Positive | No individual testing |
| Negative          | 29                 | 0        | 4005                  |
| Positive          | 12                 | 7        | 0                     |
| No pooled testing | 2047               | 40       | 0                     |

**B. *Bartonella* spp.**

| Pooled testing    | Individual testing |          |                       |
|-------------------|--------------------|----------|-----------------------|
|                   | Negative           | Positive | No individual testing |
| Negative          | 34                 | 0        | 4016                  |
| Positive          | 3                  | 0        | 0                     |
| No pooled testing | 2082               | 5        | 0                     |

**D. "*Candidatus* Mycoplasma Haematoparvum"**

| Pooled testing    | Individual testing |          |                       |
|-------------------|--------------------|----------|-----------------------|
|                   | Negative           | Positive | No individual testing |
| Negative          | 31                 | 0        | 4014                  |
| Positive          | 6                  | 2        | 0                     |
| No pooled testing | 2071               | 16       | 0                     |

<sup>a</sup> From the 6140 recruited blood donors, 10 were excluded following a positive SNAP 4Dx/4Dx Plus test for *Anaplasma* spp.
